# Supplementary material for: Methionine regulates self-renewal, pluripotency, and cell death of GIC through cholesterol - rRNA axis
Source: Research Square preprint supplement (doi:10.21203/rs.3.rs-1337704/v1), 2022-02-18
Supplement: Supplementary file 1 [file 6283eab39315af43744245b9.docx]

Supplementary Table S3

|  | Forward (5' to 3') | Reverse (5' to 3') |
| --- | --- | --- |
| MAT2A | CCACGAGGCGTTCATCGAGG | AAGTCTTGTAGTCAAAACCT |
| MAT2B | TGGGGAGCACTTGAAAGAG | CTTAGCGGCAACATGGG |
| OLIG2 | CGCCAGAGCCCGATGACCTT | GACACGGTGCCCCCAGTGAA |
| FOXM1 | ACTTTAAGCACATTGCCAAGC | CGTGCAGGGAAAGGTTGT |
| PROM1 | CAGAGTACAACGCCAAACCA | AAATCACGATGAGGGTCAGC |
| SOX4 | AGCGACAAGATCCCTTTCATTC | CGTTGCCGGACTTCACCTT |
| SOX2 | GCACATGAACGGCTGGAGCAACG | TGCTGCGAGTAGGACATGCTGTAGG |
| SREBF2 | CCGGGCGCAACGCAAAC | CGCCCATGACACCCGACAA |
| 18S | GGCGCCCCCTCGATGCTCTTAG | GCTCGGGCCTGCTTTGAACACTCT |
